# Supplementary material
Source: PubMed Central journal article supplement (PMC4542598)
Supplement: supp_civ345_civ345supp_file2.pdf [file supp_civ345_civ345supp_file2.pdf]

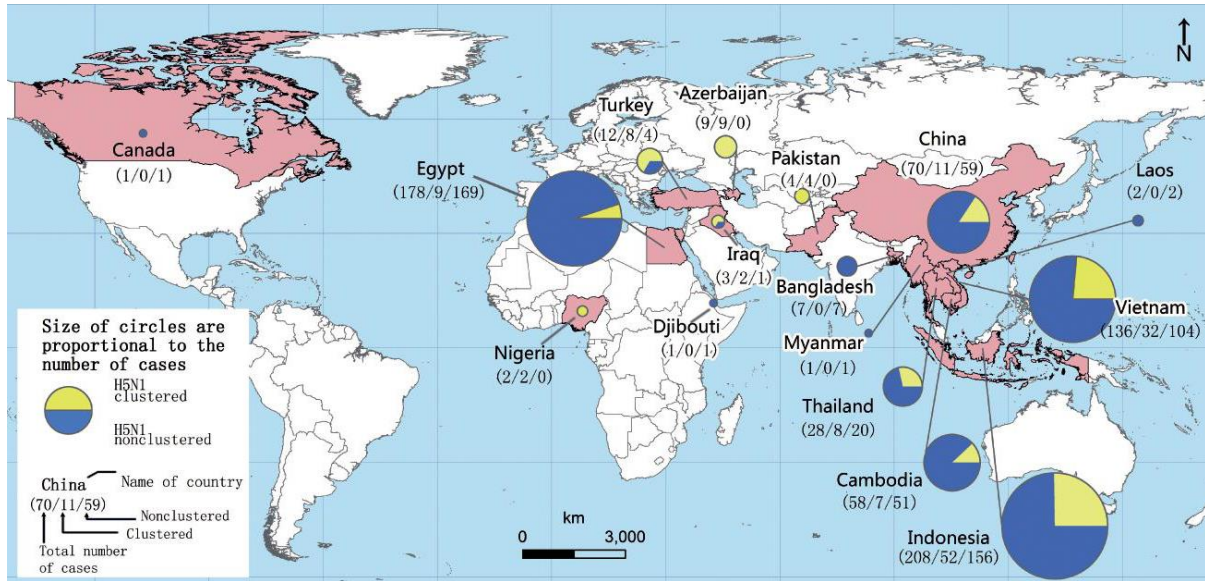

**Supplementary Figure 1:** Geographic distribution of sporadic and clustered human cases with H5N1 virus infection (as of 2 November 2014)

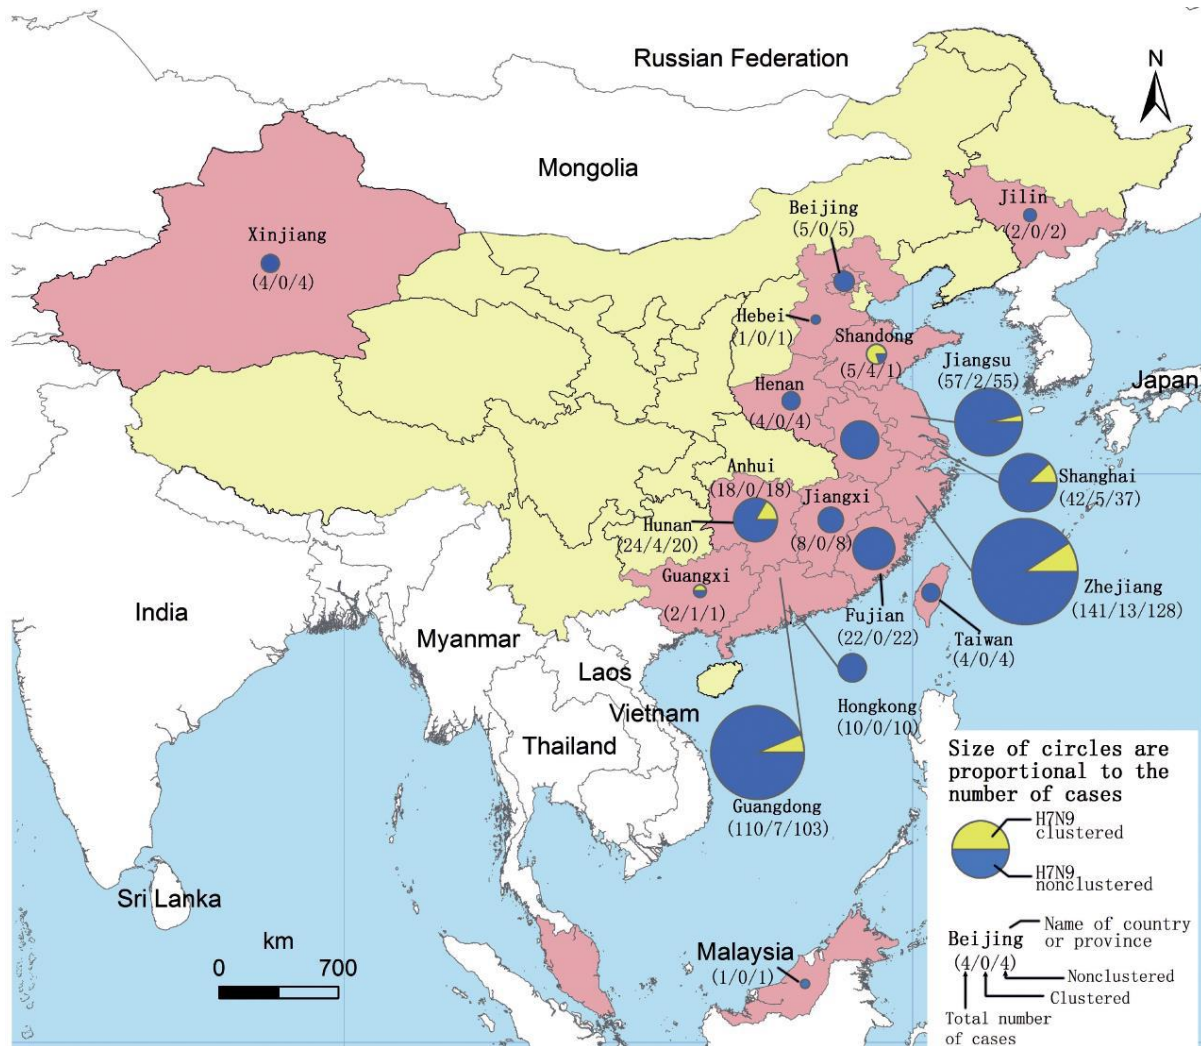

**Supplementary Figure 2:** Geographic distribution of sporadic and clustered human cases with H7N9 virus infection (as of 2 November 2014)
